# Supplementary material for: High Rate of Infection by Only Oncogenic Human Papillomavirus in Amerindians
Source: PubMed Central journal article supplement (PMC5932372; doi:10.1128/msphere.00176-18), 2018-05-02

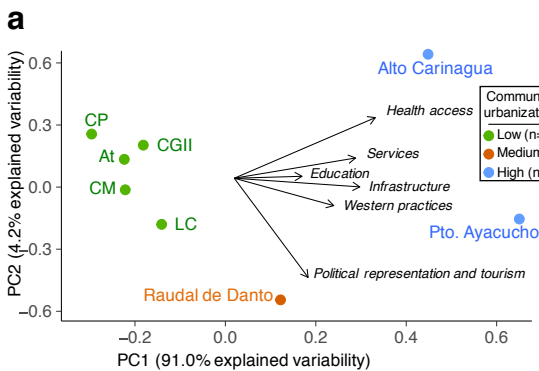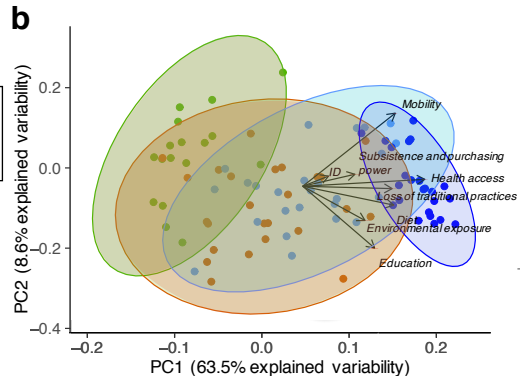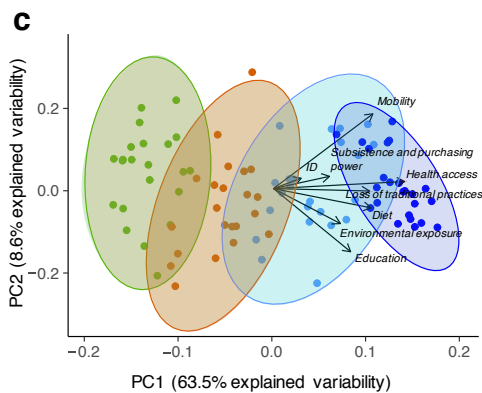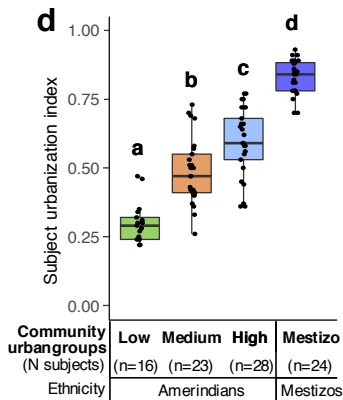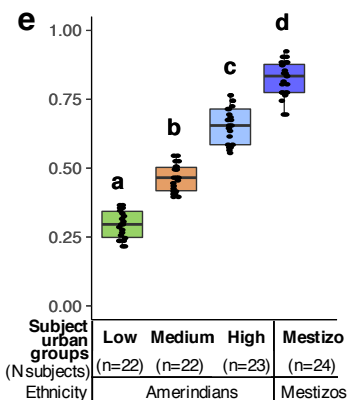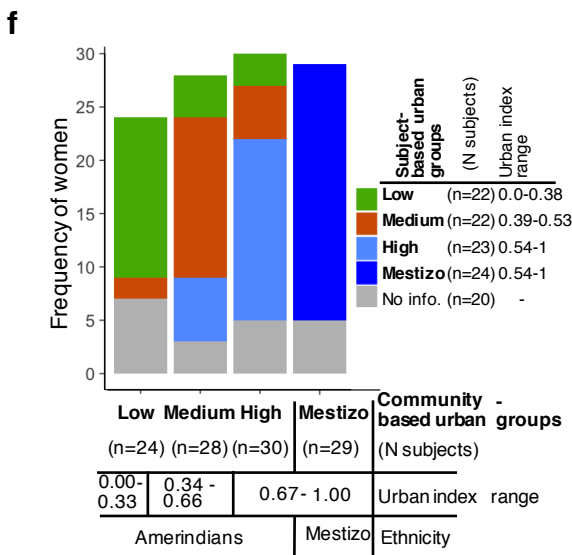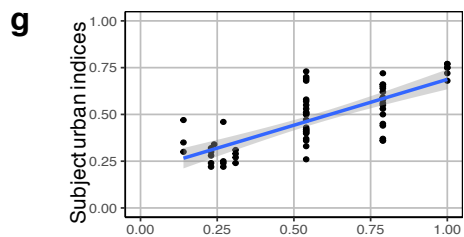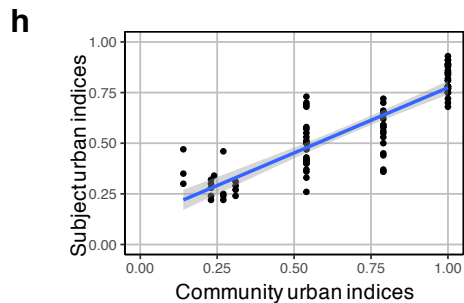

Supplement: sph003182535sf1.pdf [file sph003182535sf1.pdf]
