# Supplementary material for: High Rate of Infection by Only Oncogenic Human Papillomavirus in Amerindians
Source: PubMed Central journal article supplement (PMC5932372; doi:10.1128/msphere.00176-18), 2018-05-02
Supplement: sph003182535sf3.pdf [file sph003182535sf3.pdf]

| HPV risk type | HPV types | HPV types frequency (%) (among infected women) |               |             |                 |                |            |               |                             |                 |                |  |          |  |  |
|---------------|-----------|------------------------------------------------|---------------|-------------|-----------------|----------------|------------|---------------|-----------------------------|-----------------|----------------|--|----------|--|--|
|               |           | Community-based groups (N=83)                  |               |             |                 |                |            |               | Subject-based groups (N=66) |                 |                |  |          |  |  |
|               |           | Amerindians (N=59)                             |               |             |                 | Mestizos       |            |               | Amerindians (N=47)          |                 |                |  | Mestizos |  |  |
|               |           | Low (N=16)                                     | Medium (N=21) | High (N=22) | All Amerindians | Mestizo (N=24) | Low (N=14) | Medium (N=16) | High (N=17)                 | All Amerindians | Mestizo (N=19) |  |          |  |  |
| High-risk HPV | HPV18     | 56.3                                           | 47.6          | 40.9        | 44.6            | 37.5           | 50.0       | 56.3          | 52.9                        | 34.8            | 36.8           |  |          |  |  |
|               | HPV39     | 50.0                                           | 47.6          | 31.8        | 37.3            | 25.0           | 64.3       | 43.8          | 41.2                        | 31.8            | 26.3           |  |          |  |  |
|               | HPV16     | 18.8                                           | 28.6          | 9.1         | 16.9            | 12.5           | 28.6       | 31.3          | 29.4                        | 16.7            | 10.5           |  |          |  |  |
|               | HPV52     | 18.8                                           | 9.5           | 27.3        | 18.1            | 16.7           | 7.1        | 12.5          | 11.8                        | 10.6            | 21.1           |  |          |  |  |
|               | HPV59     | 18.8                                           | 4.8           | 0.0         | 7.2             | 8.3            | 7.1        | 6.3           | 5.9                         | 4.5             | 5.3            |  |          |  |  |
|               | HPV56     | 6.3                                            | 19.0          | 13.6        | 12.0            | 8.3            | 14.3       | 18.8          | 17.6                        | 10.6            | 5.3            |  |          |  |  |
|               | HPV31     | 6.3                                            | 4.8           | 13.6        | 7.2             | 4.2            | 7.1        | 12.5          | 11.8                        | 6.1             | 5.3            |  |          |  |  |
|               | HPV33     | 0.0                                            | 9.5           | 0.0         | 3.6             | 4.2            | 0.0        | 0.0           | 0.0                         | 0.0             | 5.3            |  |          |  |  |
|               | HPV51     | 0.0                                            | 9.5           | 0.0         | 3.6             | 4.2            | 0.0        | 6.3           | 5.9                         | 3.0             | 5.3            |  |          |  |  |
|               | HPV58     | 0.0                                            | 4.8           | 0.0         | 4.8             | 12.5           | 0.0        | 0.0           | 0.0                         | 0.0             | 15.8           |  |          |  |  |
|               | HPV45     | 0.0                                            | 0.0           | 0.0         | 0.0             | 8.3            | 0.0        | 0.0           | 0.0                         | 0.0             | 5.3            |  |          |  |  |
| Low-risk HPV  | HPV54     | 12.5                                           | 4.8           | 0.0         | 7.2             | 12.5           | 7.1        | 6.3           | 5.9                         | 3.0             | 15.8           |  |          |  |  |
|               | HPV66     | 6.3                                            | 9.5           | 0.0         | 7.2             | 12.5           | 14.3       | 0.0           | 0.0                         | 3.0             | 10.5           |  |          |  |  |
|               | HPV44     | 0.0                                            | 14.3          | 4.5         | 9.6             | 16.7           | 0.0        | 12.5          | 11.8                        | 3.0             | 10.5           |  |          |  |  |
|               | HPV68-73  | 0.0                                            | 9.5           | 4.5         | 6.0             | 8.3            | 0.0        | 6.3           | 5.9                         | 4.5             | 10.5           |  |          |  |  |
|               | HPV43     | 0.0                                            | 4.8           | 0.0         | 2.4             | 4.2            | 0.0        | 0.0           | 0.0                         | 1.5             | 5.3            |  |          |  |  |
|               | HPV34     | 0.0                                            | 4.8           | 0.0         | 1.2             | 0.0            | 0.0        | 0.0           | 0.0                         | 1.5             | 0.0            |  |          |  |  |
|               | HPV53     | 0.0                                            | 0.0           | 13.6        | 4.8             | 4.2            | 14.3       | 6.3           | 5.9                         | 4.5             | 0.0            |  |          |  |  |
|               | HPV11     | 0.0                                            | 0.0           | 4.5         | 1.2             | 0.0            | 7.1        | 0.0           | 0.0                         | 1.5             | 0.0            |  |          |  |  |
|               | HPV70     | 0.0                                            | 0.0           | 4.5         | 1.2             | 0.0            | 0.0        | 0.0           | 0.0                         | 0.0             | 0.0            |  |          |  |  |
|               | HPV74     | 0.0                                            | 0.0           | 0.0         | 2.4             | 8.3            | 0.0        | 0.0           | 0.0                         | 0.0             | 10.5           |  |          |  |  |
|               | HPV6      | 0.0                                            | 0.0           | 0.0         | 1.2             | 4.2            | 0.0        | 0.0           | 0.0                         | 0.0             | 5.3            |  |          |  |  |
