# Supplementary material for: High Rate of Infection by Only Oncogenic Human Papillomavirus in Amerindians
Source: PubMed Central journal article supplement (PMC5932372; doi:10.1128/msphere.00176-18), 2018-05-02
Supplement: sph003182535st1.pdf [file sph003182535st1.pdf]

Table S1

| Variables                                                               | Amerindian community-based urban groups |                                 |                                 |                                   | Mestizos                    | <i>p</i> value                           |  |
|-------------------------------------------------------------------------|-----------------------------------------|---------------------------------|---------------------------------|-----------------------------------|-----------------------------|------------------------------------------|--|
|                                                                         | Low                                     | Medium                          | High                            | Mestizo                           | Amer-<br>indians            | Amer-<br>indians<br>high vs.<br>Mestizos |  |
| <b>N subjects</b>                                                       | <b>24</b>                               | <b>28</b>                       | <b>30</b>                       | <b>29</b>                         | 0.710 (a)                   | 0.890 (a)                                |  |
| <b>Age, Mean [min, max]</b>                                             | <b>28.3</b> [12-46]                     | <b>30.2</b> [18-42]             | <b>31.2</b> [17-45]             | <b>26.0</b> [17-53]               | 0.500 (b)                   | 0.025 (b)                                |  |
| <b>Educational level % (n/N); [CI 95%]</b>                              |                                         |                                 |                                 |                                   | 0.001*<br>(a)               | 0.350 (a)                                |  |
| <i>No studies</i>                                                       | <b>64.7</b><br>(11/17); [41-86]         | <b>16.0</b><br>(4/25); [5.3-37] | <b>16.0</b><br>(4/25); [5.3-37] | <b>4.1</b><br>(1/24); [0.2-23]    |                             |                                          |  |
| <i>Finished elementary school</i>                                       | <b>23.5</b><br>(4/17); [7.8-50]         | <b>40.0</b><br>(10/25); [22-61] | <b>32.0</b><br>(8/25); [16-54]  | <b>12.5</b><br>(3/24); [3.3-33]   | 0.570 (a)                   | 0.170 (a)                                |  |
| <i>Finished high school</i>                                             | <b>11.8</b><br>(2/17); [2-39]           | <b>64.8</b><br>(11/25); [37-85] | <b>52.0</b><br>(13/25); [32-72] | <b>83.3</b><br>(20/24); [62-95]   | 0.020 (a)                   | 0.220 (a)                                |  |
| <b>Hormonal contraceptive**<br/>use currently % (n/N); [CI<br/>95%]</b> | <b>0.0</b><br>(0/24); [0-17]            | <b>3.6</b><br>(1/28); [0.2-20]  | <b>10.0</b><br>(3/30); [2.6-27] | <b>34.5</b><br>(10/29); [19-54]   | 0.220 (a)                   | 0.050 (a)                                |  |
| <b>Parity, mean [IQR]</b>                                               | <b>4.3</b><br>[0-11]                    | <b>4.0</b><br>[0-13]            | <b>2.9</b><br>[0-12]            | <b>1.8</b><br>[0-8]               | 0.340 (b)                   | 0.090 (b)                                |  |
| <b>Breastfeeding currently %<br/>(n/N); [CI 95%]</b>                    | <b>62.5</b><br>(15/24); [41-80]         | <b>62.9</b><br>(17/28); [41-78] | <b>36.7</b><br>(11/30); [21-56] | <b>70.0</b><br>(20/29); [49-84]   | 0.094 (b)                   | 0.026 (b)                                |  |
| <b>Sexual partner history<br/>number, Median [min-<br/>max]</b>         | <b>2.0</b><br>[1.0-10]                  | <b>2.0</b><br>[1.0-6.0]         | <b>3.0</b><br>[1.0-15]          | <b>2.0</b><br>[1.0-25]            | 0.750 (c)                   | 0.100 (c)                                |  |
| <b>Number of sexual partners in last 60 days % (n/N); [CI 95%]</b>      |                                         |                                 |                                 |                                   |                             |                                          |  |
| <i>None</i>                                                             | <b>25.0</b><br>(6/24); [11-47]          | <b>21.4</b><br>(6/28); [9-42]   | <b>30.0</b><br>(9/30); [15-50]  | <b>13.8</b><br>(4/29); [4.5-33]   | 0.750 (a)                   | 0.260 (a)                                |  |
| <i>1</i>                                                                | <b>75.0</b><br>(18/24); [53-89]         | <b>78.6</b><br>(22/28); [59-91] | <b>70.0</b><br>(21/30); [50-85] | <b>82.8</b><br>(24/29); [64-94]   |                             |                                          |  |
| <b>Sexual intercourse weekly frequency % (n/N); [CI 95%]</b>            |                                         |                                 |                                 |                                   |                             |                                          |  |
| <i>≤ 1 time</i>                                                         | <b>95.8</b><br>(23/24); [77-100]        | <b>75.0</b><br>(21/28); [55-89] | <b>70.0</b><br>(21/30); [50-85] | <b>41.4</b><br>(12/29); [24-61]   | 0.060 (a)                   | 0.050 (a)                                |  |
| <i>≥ 2 times</i>                                                        | <b>4.2</b><br>(1/24); [0.2-23]          | <b>25.0</b><br>(7/28); [11-45]  | <b>30.0</b><br>(9/30); [15-50]  | <b>58.6</b><br>(17/29); [64-94]   |                             |                                          |  |
| <b>Sexual contact with<br/>mestizo % (n/N); [CI 95%]</b>                | <b>8.3</b><br>(2/24); [15-29]           | <b>10.7</b><br>(3/28); [28-29]  | <b>46.7</b><br>(14/30); [29-65] | <b>100.0</b><br>(29/29); [85-100] | $6 \times 10^{-4}$ *<br>(a) | $2 \times 10^{-5}$ * (a)                 |  |
| <b>Currently smoking*** %<br/>(n/N); [CI 95%]</b>                       | <b>0.0</b><br>(0/24); [0-17]            | <b>0.0</b><br>(0/28); [0-15]    | <b>10.0</b><br>(3/30); [2.6-27] | <b>13.8</b><br>(4/29); [4.5-33]   | 0.034 (a)                   | 0.699 (a)                                |  |

(a)  $X^2$  test or Fisher's Exact Test

(b) T-test and ANOVA for 2 or more than two groups

(c) Kruskal-Wallis

\*Significant differences reached ( $p < 0.05$ ) after Holm correction for multiple comparisons.

\*\*For non hormonal contraceptive use, for Amerindians, Low group = 0 cases, Medium group = 1 sterilization, High group = 4 sterilizations and 2 condom use cases; for Mestizo = 3 condom use cases.

\*\*\*Smoking frequency from 1 to 10 cigarettes daily during 1 or more years
