# Supplementary material for: High Rate of Infection by Only Oncogenic Human Papillomavirus in Amerindians
Source: PubMed Central journal article supplement (PMC5932372; doi:10.1128/msphere.00176-18), 2018-05-02
Supplement: sph003182535st2.pdf [file sph003182535st2.pdf]

Table S2

| Variables                                                                                                    | Amerindian community-based urban groups |                              |                                            | Mestizos                    | <i>p</i> value*  |                                          |
|--------------------------------------------------------------------------------------------------------------|-----------------------------------------|------------------------------|--------------------------------------------|-----------------------------|------------------|------------------------------------------|
|                                                                                                              | Low                                     | Medium                       | High                                       | Mestizo                     | Amer-<br>indians | Amer-<br>indians<br>high vs.<br>Mestizos |
| Any HPV type <sup>#</sup> % (n/N);<br>[CI <sub>95%</sub> ]                                                   | 66.7<br>(16/24); [45-84]                | 75.0<br>(21/28); [55-89]     | 73.3<br>(22/30); [54-87]                   | 82.8<br>(24/29); [64-93]    | 0.783            | 0.576                                    |
| HPV prevalence <sup>#</sup> by age % (n/N); [CI <sub>95%</sub> ]                                             |                                         |                              |                                            |                             |                  |                                          |
| ≤35 years old                                                                                                | 61.1<br>(11/18); [36-82]                | 70.6<br>(12/17); [44-87]     | 79.0<br>(15/19); [54-93]                   | 80.0<br>(20/25); [59-92]    | 1.000            | 0.527                                    |
| >35 years old                                                                                                | 83.3<br>(5/6); [37-99]                  | 81.8<br>(9/11); [47-97]      | 63.6<br>(7/11); [32-88]                    | 100<br>(4/4); [40-100]      | 0.632            | 0.517                                    |
| Any HPV type <sup>#</sup> , excluding<br>women with cervical<br>abnormality % (n/N);<br>[CI <sub>95%</sub> ] | 63.6<br>(14/22); [41-82]                | 73.1<br>(19/26); [52-88]     | 68.0<br>(17/25); [47-84]                   | 88.9<br>(24/27***); [64-93] | 0.780            | 0.254                                    |
| Any high-risk HPV type <sup>#</sup><br>% (n/N); [CI <sub>95%</sub> ]                                         | 62.5<br>(15/24)[41-80]                  | 71.4<br>(20/28)[51-86]       | 66.7<br>(20/30)[47-82]                     | 65.5<br>(19/29); [46-81]    | 0.790            | 1.000                                    |
| Multiple HPV types**<br>among positive women %<br>(n/N); [CI <sub>95%</sub> ]                                | 56.3<br>(9/16); [79-31]                 | 66.7<br>(14/21); [85-43]     | 40.9<br>(9/22); [63-22]                    | 62.5<br>(15/24)[80-41]      | 0.234            | 0.242                                    |
| Cervical abnormalities<br>prevalence % (n/N);<br>[CI <sub>95%</sub> ]                                        | 8.3<br>(2/24); [1.4-29]                 | 7.1<br>(2/28); [1.2-25]      | 16.7<br>(5/30 <sup>&amp;</sup> ); [6.3-36] | 0.0<br>(0/27***); [0.0-16]  | 0.505            | 0.053                                    |
| Cervical inflammation %<br>(n/N); [CI <sub>95%</sub> ]                                                       | 100<br>(24/24); [83-<br>100]            | 100<br>(28/28); [85-<br>100] | 96.6<br>(28/29); [80-100]                  | 100<br>(27/27); [85-100]    | 1.000            | 1.000                                    |
| Intestinal helminthes <sup>&amp;&amp;</sup> %<br>(n/N); [CI <sub>95%</sub> ]                                 | 81.0<br>(17/21); [57-94]                | 76.0<br>(19/25); [54-90]     | 36.4<br>(8/22); [18-59]                    | 28.6<br>(2/7); [5.1-70]     | 0.005*           | 1.000                                    |
| Anemia <sup>&amp;&amp;&amp;</sup> (c) % (n/N);<br>[CI <sub>95%</sub> ]                                       | 41.7<br>(10/24); [23-63]                | 21.4<br>(6/28); [9.0-42]     | 16.7<br>(5/30); [6.3-36]                   | 3.4<br>(1/29); [1.6-20]     | 0.092            | 0.211                                    |

<sup>#</sup>High-risk HPV detected by the LiPA25 test: 16, 18, 31, 33, 35, 39, 45, 51, 52, 56, 58, 59. Low-risk HPV detected by the LiPA25 test: 6, 11, 34, 40, 42, 43, 44, 53, 54, 66, 68/73, 70, 74. Note: Any incidence in 68/73 is count as a one HPV type.

\**p* value reached significant differences ( $p < 0.05$ ) after Holm correction for multiple comparisons.  $X^2$  test or Fisher's Exact Test.

\*\*More than one HPV from any risk type.

\*\*\*Two cytology results from mestizo group were excluded because of poor quality smears.

<sup>&</sup>One woman was negative by cytology but positive by biopsy.

<sup>&&</sup> *Ascaris lumbricoides*, *Hymenolepis diminuta*, *Trichuris trichiura*, *Enterobius vermicularis*, *Strongyloides stercoralis*, and Ancylostomatidae

<sup>&&&</sup>Hemoglobin levels lower than 120 (g/l), according to the WHO.
