# Supplementary material for: High Rate of Infection by Only Oncogenic Human Papillomavirus in Amerindians
Source: PubMed Central journal article supplement (PMC5932372; doi:10.1128/msphere.00176-18), 2018-05-02
Supplement: sph003182535st3.pdf [file sph003182535st3.pdf]

Table S3

| Analysis                        | HPV diversity measures                                                          | Amerindian community-based |                             |                            |                            | All population (N=83) |
|---------------------------------|---------------------------------------------------------------------------------|----------------------------|-----------------------------|----------------------------|----------------------------|-----------------------|
|                                 |                                                                                 | urban groups               |                             |                            | Mestizos                   |                       |
|                                 |                                                                                 | Low (n=16)                 | Medium (n=21)               | High (n=22)                | Mestizo (n=24)             |                       |
| <b>Mean and HPV risk counts</b> | HPV type median by woman [min-max]*                                             | 2<br>[1.0-4.0]             | 2<br>[1.0-5.0]              | 1<br>[1.0-4.0]             | 2<br>[1.0-6.0]             | 2<br>[1.0-6.0]        |
|                                 | p>0.05                                                                          |                            |                             |                            |                            |                       |
|                                 | N of high and low-risk HPV types**                                              | 9                          | 16                          | 11                         | 18                         | 22                    |
|                                 | N of high-risk HPV types **                                                     | 7                          | 10                          | 6                          | 11                         | 11                    |
|                                 | N of low-risk HPV types **                                                      | 2                          | 6                           | 5                          | 7                          | 11                    |
| <b>Sample size-based</b>        | Observed richness (Hill number $q=0$ )<br>[CI <sub>95%</sub> ]                  | 10.2<br>[6.1-14.3]<br>(a)  | 16.7<br>[13.1-20.2]<br>(ab) | 11.3<br>[8.3-14.3]<br>(a)  | 19.0<br>[15.6-22.3]<br>(b) | 22.0<br>[22.4-40.7]   |
|                                 | Shannon diversity <sup>&amp;</sup> (Hill number $q=1$ )<br>[CI <sub>95%</sub> ] | 7.1<br>[4.7-9.5]<br>(a)    | 11.4<br>[8.3-14.5]<br>(ab)  | 8.4<br>[5.8-10.9]<br>(a)   | 15.2<br>[11.7-18.7]<br>(b) | 13.0<br>[13.0-16.0]   |
|                                 | Simpson diversity <sup>&amp;</sup> (Hill number $q=2$ )<br>[CI <sub>95%</sub> ] | 5.5<br>[3.6-7.5]<br>(a)    | 8.5<br>[6.6-10.3]<br>(ab)   | 6.8<br>[4.6-9.0]<br>(a)    | 12.3<br>[9.1-15.4]<br>(b)  | 9.0<br>[9.0-11.1]     |
| <b>Sample coverage-based</b>    | Observed richness (Hill number $q=0$ )<br>[CI <sub>95%</sub> ]                  | 10.3<br>[6.4-14.2]<br>(a)  | 17.4<br>[13.2-21.6]<br>(ab) | 14<br>[8.1-20.0]<br>(ab)   | 20.4<br>[16.3-24.6]<br>(b) | 22.0<br>[19.1-24.9]   |
|                                 | Shannon diversity <sup>&amp;</sup> (Hill number $q=1$ )<br>[CI <sub>95%</sub> ] | 7.1<br>[4.8-9.5]<br>(a)    | 11.8<br>[9.0-14.5]<br>(ab)  | 9.3<br>[6.2-12.5]<br>(ab)  | 16.2<br>[12.8-19.6]<br>(b) | 12.9<br>[11.4-14.6]   |
|                                 | Simpson diversity <sup>&amp;</sup> (Hill number $q=2$ )<br>[CI <sub>95%</sub> ] | 5.6<br>[3.6-7.5]<br>(a)    | 8.6<br>[6.0-11.2]<br>(ab)   | 7.3<br>[4.9-9.7]<br>(ab)   | 13.0<br>[9.3-16.6]<br>(b)  | 9.0<br>[7.3-10.6]     |
| <b>Asymptotic estimation</b>    | Observed richness (Hill number $q=0$ )<br>[CI <sub>95%</sub> ]                  | 13.2<br>[9.4-47.4]<br>(a)  | 19.4<br>[16.6-35.1]<br>(a)  | 18.6<br>[11.9-72.9]<br>(a) | 22.4<br>[19.6-38.2]<br>(a) | 24.6<br>[22.4-40.7]   |
|                                 | Shannon diversity <sup>&amp;</sup> (Hill number $q=1$ )<br>[CI <sub>95%</sub> ] | 8.1<br>[6.6-10.9]<br>(a)   | 13.6<br>[11.1-17.2]<br>(b)  | 10.4<br>[8.2-14.3]<br>(ab) | 19.1<br>[15.2-23.1]<br>(b) | 14.0<br>[13.0-15.9]   |
|                                 | Simpson diversity <sup>&amp;</sup> (Hill number $q=2$ )<br>[CI <sub>95%</sub> ] | 5.9<br>[5.3-7.8]<br>(a)    | 9.4<br>[8.3-12.2]<br>(b)    | 7.7<br>[6.8-10.4]<br>(ab)  | 15.3<br>[12.3-19.5]<br>(c) | 9.3<br>[9.0-10.9]     |
| <b>Beta diversity</b>           | Sorensen dissimilarity index mean <sup>&amp;&amp;</sup>                         | 0.758                      | 0.793                       | 0.809                      | 0.830                      | -                     |
| p>0.05                          |                                                                                 |                            |                             |                            |                            |                       |

\* Mean comparison was performed with Kruskal-Wallis.

\*\* High-risk HPV detected by the LiPA25 test: 16, 18, 31, 33, 35, 39, 45, 51, 52, 56, 58, 59. Low-risk HPV detected by the LiPA25 test: 6, 11, 34, 40, 42, 43, 44, 53, 54, 66, 68/73, 70, 74. Note: Any incidence in 68/73 is count as a one HPV type.

& Shannon diversity refers to  $\exp(\text{Shannon diversity})$  and Simpson diversity refers to  $1/\text{Simpson index}$ .

&& Sorensen index of dissimilarity  $B_w = (b+c)/(2*a+b+c)$ . Comparisons were performed with permutation test for homogeneity of multivariate dispersions, based in 99 permutations.

(a, b) Different letters across groups indicate significant differences, with not overlapping of the 95% confidence interval (CI<sub>95%</sub>).
