# Supplementary material for: High Rate of Infection by Only Oncogenic Human Papillomavirus in Amerindians
Source: PubMed Central journal article supplement (PMC5932372; doi:10.1128/msphere.00176-18), 2018-05-02
Supplement: sph003182535st4.pdf [file sph003182535st4.pdf]

**Table S4**

| Analysis              | HPV diversity measures                                                          | Amerindian subject-based urban groups |                                   |                                   | Mestizos                          | All population (N=66)      |
|-----------------------|---------------------------------------------------------------------------------|---------------------------------------|-----------------------------------|-----------------------------------|-----------------------------------|----------------------------|
|                       |                                                                                 | Low (n=14)                            | Medium (n=16)                     | High (n=17)                       | Mestizo (n=19)                    |                            |
| Sample coverage-based | Observed richness (Hill number $q=0$ )<br>[CI <sub>95%</sub> ]                  | <b>12.3</b><br>[8.5-16.1]<br>(a)      | <b>13</b><br>[9.6-16.4]<br>(a)    | <b>17.5</b><br>[10.9-24.1]<br>(a) | <b>20.9</b><br>[15.5-26.3]<br>(a) | <b>22</b><br>[19.1-25.0]   |
|                       | Shannon diversity <sup>&amp;</sup> (Hill number $q=1$ )<br>[CI <sub>95%</sub> ] | <b>8.2</b><br>[5.9-10.5]<br>(a)       | <b>9</b><br>[6.7-11.3]<br>(a)     | <b>12.1</b><br>[7.9-16.3]<br>(ab) | <b>16.3</b><br>[12.2-20.5]<br>(b) | <b>13</b><br>[11.4-14.6]   |
|                       | Simpson diversity <sup>&amp;</sup> (Hill number $q=2$ )<br>[CI <sub>95%</sub> ] | <b>6.1</b><br>[4.2-7.9]<br>(a)        | <b>6.9</b><br>[4.7-9.1]<br>(ab)   | <b>8.6</b><br>[5.2-12.0]<br>(ab)  | <b>12.8</b><br>[8.6-17.1]<br>(b)  | <b>9.0</b><br>[7.5-10.5]   |
| Asymptotic estimation | Observed richness (Hill number $q=0$ )<br>[CI <sub>95%</sub> ]                  | <b>14.8</b><br>[11.6-35.1]<br>(a)     | <b>15.9</b><br>[12.6-36.3]<br>(a) | <b>20.6</b><br>[14.4-53.1]<br>(a) | <b>24.0</b><br>[19.2-46.4]<br>(a) | <b>23.6</b><br>[39.6-21.4] |
|                       | Shannon diversity <sup>&amp;</sup> (Hill number $q=1$ )<br>[CI <sub>95%</sub> ] | <b>9.8</b><br>[7.7-13]<br>(a)         | <b>10.8</b><br>[8.6-14.3]<br>(a)  | <b>14.2</b><br>[9.8-21.0]<br>(ab) | <b>19.9</b><br>[14.4-25.7]<br>(b) | <b>13.8</b><br>[16-12.6]   |
|                       | Simpson diversity <sup>&amp;</sup> (Hill number $q=2$ )<br>[CI <sub>95%</sub> ] | <b>6.6</b><br>[5.8-9.0]<br>(a)        | <b>7.7</b><br>[6.7-10.2]<br>(a)   | <b>9.6</b><br>[7.7-14]<br>(ab)    | <b>15.4</b><br>[11.7-20.6]<br>(b) | <b>9.1</b><br>[10.9-8.7]   |

& Shannon diversity refers to  $\exp(\text{Shannon diversity})$  and Simpson diversity refers to  $1/\text{Simpson index}$ .

(a, b) Different letters across groups indicate significant differences, with not overlapping of the 95% confidence interval (CI95%)
