# Supplementary material for: High Rate of Infection by Only Oncogenic Human Papillomavirus in Amerindians
Source: PubMed Central journal article supplement (PMC5932372; doi:10.1128/msphere.00176-18), 2018-05-02
Supplement: sph003182535st5.pdf [file sph003182535st5.pdf]

Table S5

| Analysis                        | HPV measures                                                                       | Body sites                                                                                                     |                                       |                                      |                                      |
|---------------------------------|------------------------------------------------------------------------------------|----------------------------------------------------------------------------------------------------------------|---------------------------------------|--------------------------------------|--------------------------------------|
|                                 |                                                                                    | Cervix<br>(n=14)                                                                                               | Introitus<br>(n=10)                   | Anal<br>(n=7)                        | Oral<br>(n=6)                        |
| Prevalence<br>and HPV<br>counts | Prevalence of any HPV type %<br>(n/N); [CI <sub>95%</sub> ] *                      | <b>77.8</b><br>(14/18) [52-93]<br>(a)                                                                          | <b>55.5</b><br>(10/18) [31-78]<br>(b) | <b>38.9</b><br>(7/18) [18-64]<br>(b) | <b>33.3</b><br>(6/18) [14-59]<br>(b) |
|                                 | N of high and low-risk HPV types                                                   | <b>15</b>                                                                                                      | <b>6</b>                              | <b>4</b>                             | <b>7</b>                             |
|                                 | N of high-risk HPV types                                                           | <b>9</b>                                                                                                       | <b>2</b>                              | <b>2</b>                             | <b>3</b>                             |
|                                 | N of low-risk HPV types                                                            | <b>6</b>                                                                                                       | <b>4</b>                              | <b>2</b>                             | <b>4</b>                             |
| Total HPV types detected        |                                                                                    | <b>18</b> (high- risk: HPV31, 16, 18, 31, 33, 39, 52, 56, 59; Low-risk: 11, 44, 53, 54, 66, 68, 68/73, 70, 74) |                                       |                                      |                                      |
| Sample size-<br>based           | Observed richness (Hill number<br>$q=0$ ) [CI <sub>95%</sub> ] **                  | <b>12.8</b><br>[9.2-16.3]<br>(b)                                                                               | <b>3.1</b><br>[1.3-4.9]<br>(a)        | <b>5.3</b><br>[2.0-8.7]<br>(a)       | <b>3.3</b><br>[1.1-5.6]<br>(a)       |
|                                 | Shannon diversity <sup>&amp;</sup> (Hill number<br>$q=1$ ) [CI <sub>95%</sub> ] ** | <b>9.7</b><br>[6.2-13.1]<br>(b)                                                                                | <b>2.5</b><br>[1.2-3.8]<br>(a)        | <b>4.5</b><br>[2.2-6.9]<br>(ab)      | <b>2.7</b><br>[1.3-4]<br>(a)         |
|                                 | Simpson diversity (Hill number<br>$q=2$ ) [CI <sub>95%</sub> ] **                  | <b>7.3</b><br>[4.6-10.1]<br>(b)                                                                                | <b>2.2</b><br>[0.9-3.4]<br>(a)        | <b>3.6</b><br>[0.8-6.4]<br>(ab)      | <b>2.2</b><br>[1.0-3.5]<br>(a)       |
| Sample<br>coverage-<br>based    | Observed richness (Hill number<br>$q=0$ ) [CI <sub>95%</sub> ] **                  | <b>18.2</b><br>[12.0-24.4]<br>(b)                                                                              | <b>2.7</b><br>[1.4-4.1]<br>(a)        | <b>5.6</b><br>[2.2-9.1]<br>(a)       | <b>2.6</b><br>[1.4-3.7]<br>(a)       |
|                                 | Shannon diversity <sup>&amp;</sup> (Hill number<br>$q=1$ ) [CI <sub>95%</sub> ] ** | <b>12.2</b><br>[7.6-16.9]<br>(b)                                                                               | <b>2.3</b><br>[1.1-3.4]<br>(a)        | <b>4.9</b><br>[2.0-7.8]<br>(ab)      | <b>2.2</b><br>[1.1-3.3]<br>(a)       |
|                                 | Simpson diversity (Hill number<br>$q=2$ ) [CI <sub>95%</sub> ] **                  | <b>8.3</b><br>[4.9-11.7]<br>(b)                                                                                | <b>2.0</b><br>[1.0-3.0]<br>(a)        | <b>3.7</b><br>[0.7-6.8]<br>(ab)      | <b>2.0</b><br>[1.0-2.9]<br>(a)       |
| Asymptotic<br>estimation        | Observed richness (Hill number<br>$q=0$ ) [CI <sub>95%</sub> ] **                  | <b>9.5</b><br>[16.0-62.6]<br>(b)                                                                               | <b>1.2</b><br>[3.0-10.7]<br>(a)       | <b>3.7</b><br>[4.3-24.8]<br>(a)      | <b>1.1</b><br>[3.0-10.2]<br>(a)      |
|                                 | Shannon diversity <sup>&amp;</sup> (Hill number<br>$q=1$ ) [CI <sub>95%</sub> ] ** | <b>3.5</b><br>[10.2-22.4]<br>(b)                                                                               | <b>1.0</b><br>[2.4-4.9]<br>(a)        | <b>2.7</b><br>[3.4-11.6]<br>(ab)     | <b>0.9</b><br>[2.4-4.6]<br>(a)       |
|                                 | Simpson diversity (Hill number<br>$q=2$ ) [CI <sub>95%</sub> ] **                  | <b>2.0</b><br>[7.6-13.2]<br>(b)                                                                                | <b>0.8</b><br>[2.1-4.0]<br>(a)        | <b>2.4</b><br>[3.0-9.1]<br>(ab)      | <b>0.8</b><br>[2.1-3.8]<br>(a)       |

\* Analysis of HPV prevalence among groups were performed with log-lineal model.

\*\*Shannon diversity refers to exp(Shannon diversity) and Simpson diversity refers to 1/Simpson index.

(a, b) Different letters across groups indicate significant differences. Diversity comparison was performed based on the not overlapping of the 95% confidence Interval (CI<sub>95%</sub>).
