# Supplementary material for: High Rate of Infection by Only Oncogenic Human Papillomavirus in Amerindians
Source: PubMed Central journal article supplement (PMC5932372; doi:10.1128/msphere.00176-18), 2018-05-02
Supplement: sph003182535st6.pdf [file sph003182535st6.pdf]

**Table S6**

| <b>Categories</b>             | <b>Body site comparisons</b> | <b>Cohen's kappa</b> | <b>Cohen's kappa interpretation*</b> | <b>Sensibility**</b> | <b>Specificity***</b> |
|-------------------------------|------------------------------|----------------------|--------------------------------------|----------------------|-----------------------|
| <b>Any high-risk HPV type</b> | Cervix vs. introitus         | 0.26                 | fair                                 | 0.43                 | 0.77                  |
|                               | Cervix vs. oral              | 0.26                 | fair                                 | 0.43                 | 0.82                  |
|                               | Cervix vs. anal              | -0.11                | less than chance                     | 0.45                 | 0.43                  |
|                               | Anal vs. introitus           | -0.27                | less than chance                     | 0.38                 | 1.00                  |
|                               | Anal vs. oral                | 0.26                 | fair                                 | 0.40                 | 0.77                  |
|                               | Oral vs. introitus           | 0.17                 | slight                               | 0.40                 | 0.77                  |
| <b>HPV18</b>                  | Cervix vs. introitus         | 0.18                 | slight                               | 0.60                 | 0.62                  |
|                               | Cervix vs. oral              | -0.05                | less than chance                     | 0.43                 | 0.91                  |
|                               | Cervix vs. anal              | 0.37                 | fair                                 | 0.20                 | 0.85                  |
|                               | Anal vs. introitus           | 0.37                 | fair                                 | 0.40                 | 0.92                  |
|                               | Anal vs. oral                | 0.05                 | slight                               | 0.20                 | 0.85                  |
|                               | Oral vs. introitus           | 0.17                 | slight                               | 0.40                 | 0.77                  |

\*Interpretation: < 0 less than chance; 0.01–0.20 slight; 0.21– 0.40 fair; 0.41–0.60 moderate; 0.61–0.80 substantial; and 0.81–0.99 almost perfect

\*\*Measures the proportion of positives that are commonly identified in two body sites

\*\*\*Measures the proportion of negatives that are commonly identified in two body sites
