# Supplementary material for: High Rate of Infection by Only Oncogenic Human Papillomavirus in Amerindians
Source: PubMed Central journal article supplement (PMC5932372; doi:10.1128/msphere.00176-18), 2018-05-02
Supplement: sph003182535st7.pdf [file sph003182535st7.pdf]

**Table S7**

| <b>Host ID</b> | <b>Subject-based groups</b>               | <b>Community-based groups</b> | <b>Ethnicity*</b> | <b>Age</b> | <b>Cervical abnormalities type **</b> | <b>HPV High-risk ***</b> | <b>HPV Low-risk &amp;</b> |
|----------------|-------------------------------------------|-------------------------------|-------------------|------------|---------------------------------------|--------------------------|---------------------------|
| 10             | Medium                                    | High                          | Amerindian        | 18         | LGSIL                                 | 18, 31                   | 44, 53                    |
| 13             | High                                      | High                          | Amerindian        | 41         | ASGUS                                 | 18                       | none                      |
| 15             | High                                      | High                          | Amerindian        | 41         | LGSIL                                 | 16                       | none                      |
| 124            | <i>Missing</i> <sup>&amp;&amp;&amp;</sup> | High                          | Amerindian        | 26         | LGSIL                                 | 52                       | none                      |
| 2              | Medium                                    | High                          | Amerindian        | 35         | LGSIL <sup>&amp;&amp;</sup>           | 31                       | none                      |
| 70             | Low                                       | Medium                        | Amerindian        | 35         | LGSIL                                 | 16, 18, 39, 56           | none                      |
| 69             | Medium                                    | Medium                        | Amerindian        | 25         | HGSIL                                 | 16, 18, 39               | none                      |
| 109            | <i>Missing</i> <sup>&amp;&amp;&amp;</sup> | Low                           | Amerindian        | 46         | LGSIL                                 | 18, 39, 59               | none                      |
| 92             | Low                                       | Low                           | Amerindian        | 33         | LGSIL                                 | 16, 18                   | none                      |

\* Living in Amerindian villages and/or self-identified.

\*\*LGSIL, Low Grade Squamous Intraepithelial Lesion; HGSIL, High Grade Squamous Intraepithelial Lesion; ASGUS, Atypical Squamous Glandular Cells of Undetermined Significance

\*\*\*Possible high-risk HPV detected by the LiPA25 test: 16, 18, 31, 33, 35, 39, 45, 51, 52, 56, 58, 59.

&Possible low-risk HPV detected by the LiPA25 test: 6, 11, 34, 40, 42, 43, 44, 53, 54, 66, 68/73, 70, 74.

&&No abnormality detected by cytology but by biopsy

&&& *Missing*. No subject-based survey could be applied.
